# Supplementary material for: Local electrocatalytic activity of PtRu supported on nitrogen-doped carbon nanotubes towards methanol oxidation by scanning electrochemical microscopy
Source: Royal Society of Chemistry journal article supplement (doi:10.1039/d1ta04962c), 2021-01-01
Supplement: d1ta04962c1.pdf [file d1ta04962c1.pdf]

## Supporting Information

### Local electrocatalytic activity of PtRu supported on nitrogen doped carbon nanotubes towards methanol oxidation by scanning electrochemical microscopy

Divyani Gupta<sup>a</sup>, Sudip Chakraborty<sup>b</sup>, Rodrigo G. Amorim<sup>b</sup>, Rajeev Ahuja<sup>a1,b</sup>, Tharamani C. Nagaiah<sup>a\*</sup>

<sup>a</sup>Department of Chemistry, <sup>a1</sup>Department of Physics, Indian Institute of Technology Ropar, Rupnagar 140001, Punjab, India

<sup>b</sup> Department of Physics and Astronomy, Uppsala Universitet, Sweden.

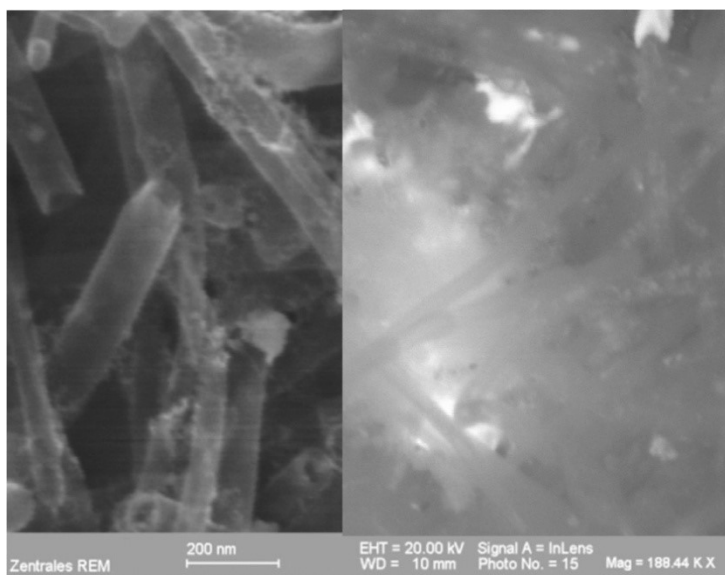

**Fig. S1:** SEM images of the PtRu/NCNT-200 catalyst in the secondary electron (SE, left) and back scattered electron (BSE, Right) mode.

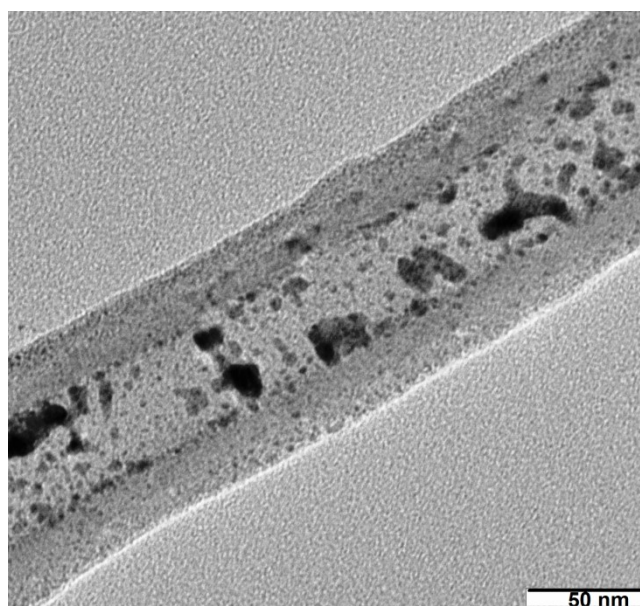

**Fig. S2:** TEM images of the PtRu/NCNT-200 catalyst.

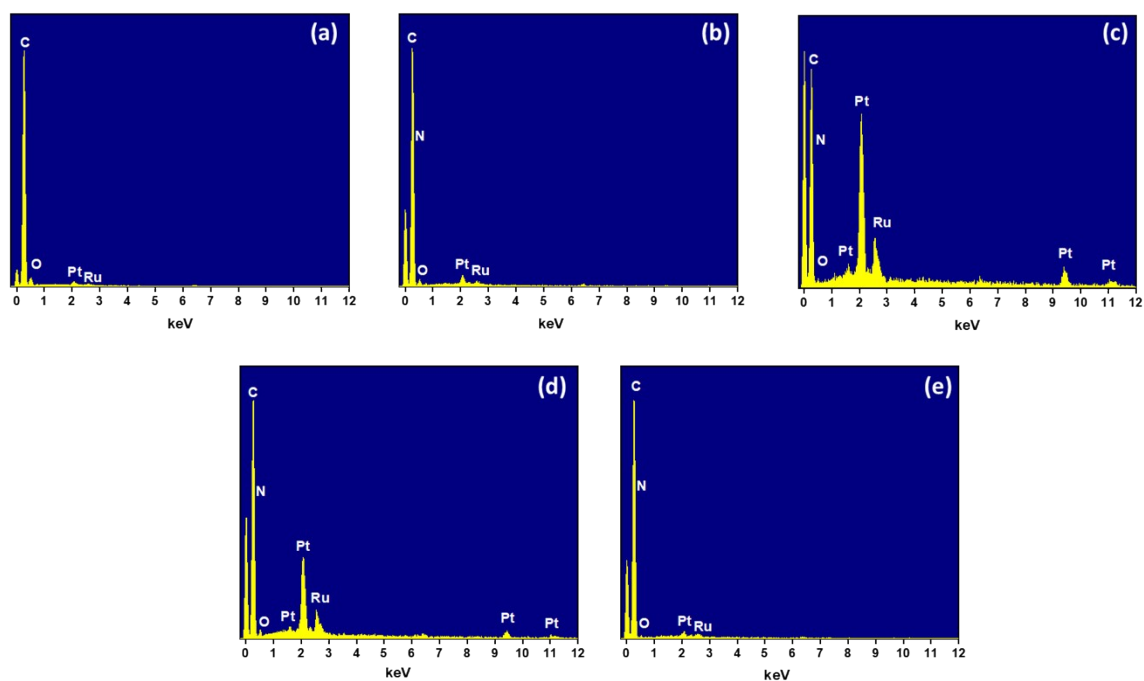

**Fig. S3:** EDAX spectrum of (a) PtRu/OCNT, (b) PtRu/NCNT-200, (c) PtRu/NCNT-400, (d) PtRu/NCNT-600 and (e) PtRu/NCNT-800 catalyst extracted from TEM images respectively.

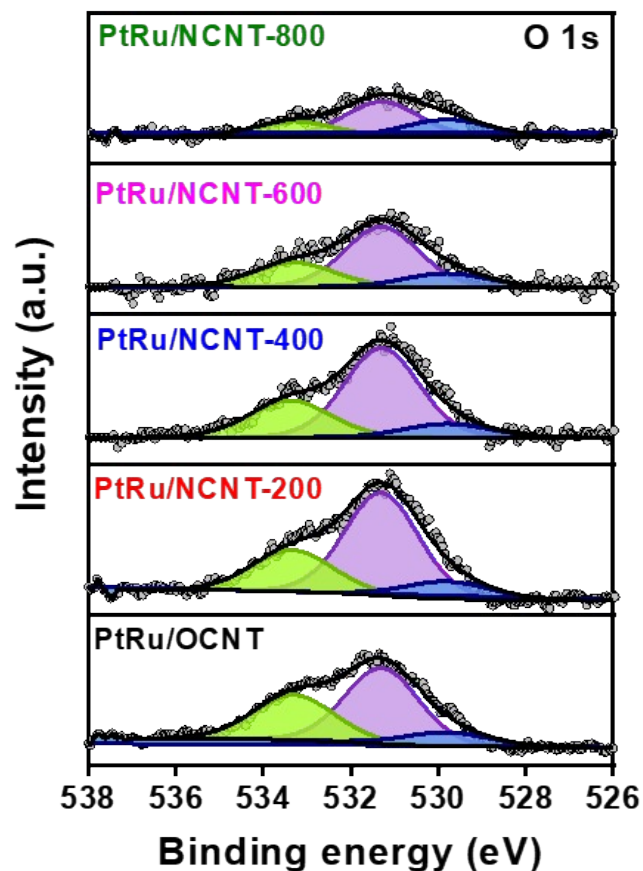

**Fig. S4:** Deconvoluted O 1s XP spectra of PtRu catalyst on different CNTs supports *i.e.* OCNT, NCNT-200, NCNT-400, NCNT-600 and NCNT-800.

**Table S1:** XPS surface atomic concentration of PtRu catalyst on different CNTs support.

| Catalyst  | C at.% | O at.% | N at.% | Pt at.% | Ru at.% |
|-----------|--------|--------|--------|---------|---------|
| OCNTs     | 91.6   | 6.6    | N/A    | 0.9     | 0.9     |
| NCNT- 200 | 89.6   | 6.2    | 2.0    | 1.1     | 1.1     |
| NCNT- 400 | 88.8   | 6.0    | 2.7    | 1.2     | 1.3     |
| NCNT- 600 | 91.0   | 4.8    | 2.7    | 1.2     | 1.3     |
| NCNT- 800 | 94.1   | 3.2    | 1.3    | 0.7     | 0.7     |

**Table S2:** Species and relative concentration of N as obtained from XPS N 1s spectra. N1: pyridinic and nitrile, at 398.6eV; N2: pyrrolic and amine, at 400.2eV; N3: quaternary, at 401.2eV; N4: pyridine oxide, at 403.0-404.0 eV.

| <b>Samples</b>   | <b>N1 at.%</b> | <b>N2 at.%</b> | <b>N3 at.%</b> | <b>N4 at.%</b> |
|------------------|----------------|----------------|----------------|----------------|
| <b>NCNTs200C</b> | 32.9           | 42.2           | 12.2           | 12.7           |
| <b>NCNTs400C</b> | 39.5           | 40.6           | 12.7           | 7.2            |
| <b>NCNTs600C</b> | 42.2           | 35.8           | 13.6           | 8.4            |
| <b>NCNTs800C</b> | 34.9           | 28.9           | 22.0           | 14.2           |

**Table S3:** Species and relative concentration of Pt as obtained from XPS Pt 4f spectra. The spectra were deconvoluted into three pairs of peaks which are assigned to Pt<sup>0</sup> (71.4, 74.8 eV), Pt<sup>δ+</sup> (72.1, 75.5 eV), and PtO (73.8, 77.5 eV) species.

| <b>Catalyst</b> | <b>Pt<sup>0</sup> at.%</b> | <b>Pt<sup>δ+</sup> at.%</b> | <b>PtO at.%</b> |
|-----------------|----------------------------|-----------------------------|-----------------|
| <b>OCNTs</b>    | 60.2                       | 31.0                        | 8.8             |
| <b>NCNT-200</b> | 55.2                       | 26.1                        | 9.8             |
| <b>NCNT-400</b> | 55.2                       | 36.0                        | 8.8             |
| <b>NCNT-600</b> | 59.7                       | 32.4                        | 7.9             |
| <b>NCNT-800</b> | 56.2                       | 31.5                        | 12.3            |

**Table S4:** Species and relative concentration of Ru as obtained from XPS Ru 3p spectra. The spectra were deconvoluted into three peaks which are attributed to Ru<sup>0</sup> (461.9 eV), RuO<sub>2</sub> (463.9 eV), and RuO<sub>2</sub>·xH<sub>2</sub>O (467.3 eV) species.

| Catalyst | Ru <sup>0</sup><br>at.% | RuO <sub>2</sub><br>at.% | RuO <sub>2</sub> ·xH <sub>2</sub><br>O at.% |
|----------|-------------------------|--------------------------|---------------------------------------------|
| OCNTs    | 64.4                    | 19.1                     | 16.5                                        |
| NCNT-200 | 55.4                    | 25.2                     | 19.4                                        |
| NCNT-400 | 56.5                    | 23.1                     | 20.4                                        |
| NCNT-600 | 56.4                    | 22.8                     | 20.8                                        |
| NCNT-800 | 60.0                    | 27.5                     | 13.5                                        |

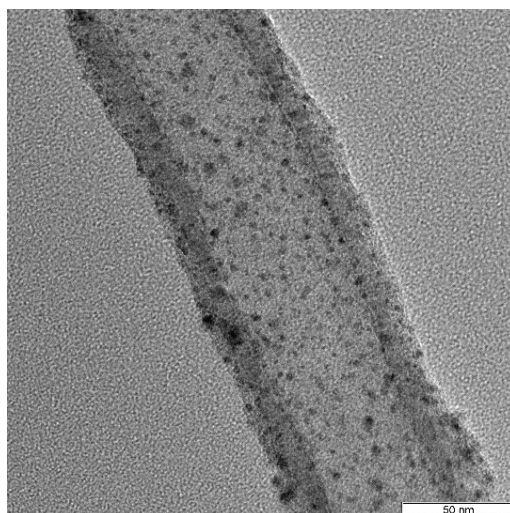

**Fig. S5:** TEM images of the PtRu/NCNT-400 catalyst after the stability studies.

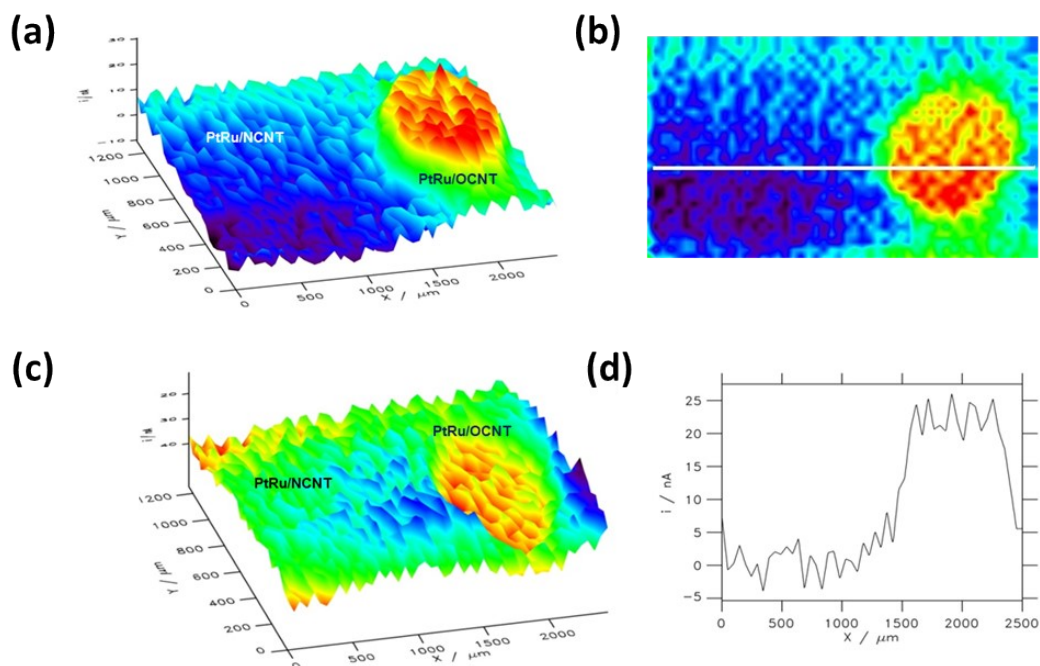

**Fig. S6:** (a) RC-SECM 3D-images of PtRu/OCNT and PtRu/NCNT-400 catalyst spots in 1 M  $\text{CH}_3\text{OH} + 0.5 \text{ M H}_2\text{SO}_4$  at an applied sample potential of +0.3 V. The tip (Pt-microelectrode, 25  $\mu\text{m}$ ) was polarized at +0.05 V during P1 and at +0.3 V during P2. (b) RC-SECM 2D-image of ‘a’, (c) at an applied sample potential of +0.5 V (d) Line scan extracted from 2D-image ‘b’. Images taken after 368 ms of the detection pulse.

**Table S5:** Binding energy, closest distance of OCNT and NCNT. We also show the C.A (closest atoms) between tube-molecule

|                    | OCNT |                    |            | NCNT-200 |                    |            | NCNT-400      |                    |            | NCNT-800 |                    |            |
|--------------------|------|--------------------|------------|----------|--------------------|------------|---------------|--------------------|------------|----------|--------------------|------------|
|                    | C.A. | d ( $\text{\AA}$ ) | $E_b$ (eV) | C.A.     | d ( $\text{\AA}$ ) | $E_b$ (eV) | C.A.          | d ( $\text{\AA}$ ) | $E_b$ (eV) | C.A.     | d ( $\text{\AA}$ ) | $E_b$ (eV) |
| CO                 | Ru-C | 1.895              | -2.821     | Ru-C     | 1.881              | -3.014     | Ru-C          | 1.928              | -2.476     | Ru-C     | 1.923              | -2.374     |
| CH <sub>3</sub> OH | Ru-H | 1.898              | -0.715     | Ru-H     | 1.879              | -0.784     | Ru-O<br>(O-H) | 2.222<br>(1.56)    | -1.644     | Ru-H     | 2.156              | -0.233     |

**Table S6:** Comparison of activity with reported Pt-Ru based catalysts for methanol oxidation

| S.No. | Composite                                              | Electrolyte                                                       | Mass Activity (A mg <sup>-1</sup> ) | Ref. |
|-------|--------------------------------------------------------|-------------------------------------------------------------------|-------------------------------------|------|
| 1.    | PtRu/rGO                                               | 0.5 M H <sub>2</sub> SO <sub>4</sub> + 1 M CH <sub>3</sub> OH     | 0.74                                | 1    |
| 2.    | Pt@mPtRu YSs                                           | 0.5 M H <sub>2</sub> SO <sub>4</sub> + 1 M CH <sub>3</sub> OH     | 0.56                                | 2    |
| 3.    | mPtRu NCs                                              | 0.5 M H <sub>2</sub> SO <sub>4</sub> + 1 M CH <sub>3</sub> OH     | 0.41                                | 2    |
| 4.    | PtRu/ RGO/TNTs                                         | 0.5 M H <sub>2</sub> SO <sub>4</sub> + 1 M CH <sub>3</sub> OH     | 0.32                                | 3    |
| 5.    | PtRuCu NFs-HAc/C                                       | 0.1 M HClO <sub>4</sub> and 1 M CH <sub>3</sub> OH                | 0.37                                | 4    |
| 6.    | Pt <sub>66</sub> Ni <sub>27</sub> Ru <sub>7</sub> DNSs | 0.5 M H <sub>2</sub> SO <sub>4</sub> + 0.5 M CH <sub>3</sub> OH   | 0.81                                | 5    |
| 7.    | d-Pt@Ru                                                | 0.5 M H <sub>2</sub> SO <sub>4</sub> + 1 M CH <sub>3</sub> OH     | 0.8                                 | 6    |
| 8.    | Ru/Pt NWs                                              | 0.1M HClO <sub>4</sub> + 1 M CH <sub>3</sub> OH                   | 0.57                                | 7    |
| 9.    | Pt <sub>1</sub> Ru <sub>1</sub> /C@NC                  | 0.1M HClO <sub>4</sub> + 0.5 M CH <sub>3</sub> OH                 | 0.67                                | 8    |
| 10.   | PtRu NWs                                               | 0.1M HClO <sub>4</sub> + 0.5 M CH <sub>3</sub> OH                 | 0.82                                | 9    |
| 12.   | PtRu nanodendrites                                     | 0.1 M HClO <sub>4</sub> + 1.0 M CH <sub>3</sub> OH                | 0.52                                | 10   |
| 13.   | PtRu coreshell                                         | 0.5 M H <sub>2</sub> SO <sub>4</sub> + 1.0 M CH <sub>3</sub> OH   | 0.4                                 | 11   |
| 14.   | PtRuCu hexapod                                         | 0.1 M HClO <sub>4</sub> + 1.0 M CH <sub>3</sub> OH                | 0.55                                | 12   |
| 15.   | PtRu/PPDA-MWCNTs                                       | 0.5 M H <sub>2</sub> SO <sub>4</sub> + 1.0 M CH <sub>3</sub> OH   | 0.731                               | 13   |
| 16.   | PtRu/TiO <sub>2</sub> -CNF                             | 0.5 M H <sub>2</sub> SO <sub>4</sub> + 2.0 M CH <sub>3</sub> OH   | 0.603                               | 14   |
| 17.   | PtRu/C*<br>PtRu20/TECNF                                | 0.5 M H <sub>2</sub> SO <sub>4</sub> + 0.5 M CH <sub>3</sub> OH   | 0.076<br>0.10                       | 15   |
| 18.   | PtRu icosahedra                                        | 0.5 M H <sub>2</sub> SO <sub>4</sub> + 0.5 M CH <sub>3</sub> OH   | 0.074                               | 16   |
| 19.   | PtRuCuW                                                | 0.5 M H <sub>2</sub> SO <sub>4</sub> and 0.5 M CH <sub>3</sub> OH | 0.47                                | 17   |
| 20.   | PtRuCu/C                                               | 0.5 M H <sub>2</sub> SO <sub>4</sub> + 1 M CH <sub>3</sub> OH     | 0.79                                | 18   |
| 21.   | PtRu/N-doped C                                         | 0.5 M H <sub>2</sub> SO <sub>4</sub> + 1 M                        | 0.15                                | 19   |

|     |                        | CH <sub>3</sub> OH                                                                                 |      |           |
|-----|------------------------|----------------------------------------------------------------------------------------------------|------|-----------|
| 22. | PtRu/C-TiN-10%         | 0.5 mol L <sup>-1</sup> H <sub>2</sub> SO <sub>4</sub> +0.5 mol L <sup>-1</sup> CH <sub>3</sub> OH | 0.81 | 20        |
| 23. | PtRuWO <sub>x</sub> /C | 0.5 mol L <sup>-1</sup> H <sub>2</sub> SO <sub>4</sub> +0.5 mol L <sup>-1</sup> CH <sub>3</sub> OH | 0.06 | 21        |
| 24. | PtRu/PANI/CNTs         | 0.5 M H <sub>2</sub> SO <sub>4</sub> + 1 M CH <sub>3</sub> OH                                      | 0.4  | 22        |
| 25. | PtRu/NCNT-400          | 0.5 M H <sub>2</sub> SO <sub>4</sub> + 1 M CH <sub>3</sub> OH                                      | 0.85 | This work |

PtRu/C\* (commercial catalyst)

## References

1. Y. Shi, W. Zhu, H. Shi, F. Liao, Z. Fan and M. Shao, *J. Colloid Interface Sci.*, 2019, **557**, 729-736.
2. S. Yin, R. D. Kumar, H. Yu, C. Li, Z. Wang, Y. Xu, X. Li, L. Wang and H. Wang, *ACS Sustain. Chem. Eng.*, 2019, **7**, 14867-14873.
3. J. Han, L. Yang, L. Yang, W. Jiang, X. Luo and S. Luo, *Int. J. Hydrog. Energy*, 2018, **43**, 7338-7346.
4. H.-J. Yin, Z.-P. Zhang, Y. Guo, K. Yuan and Y.-W. Zhang, *Mater. Chem. Front.*, 2020, **4**, 1985-1992.
5. Y. Lu, W. Wang, X. Chen, Y. Zhang, Y. Han, Y. Cheng, X.-J. Chen, K. Liu, Y. Wang and Q. Zhang, *Nano Res.*, 2019, **12**, 651-657.
6. X. Bai, J. Geng, S. Zhao, H. Li and F. Li, *ACS Appl. Mater. Interfaces*, 2020, **12**, 23046-23050.
7. M. Li, Y. Wang, J. Cai, Y. Li, Y. Liu, Y. Dong, S. Li, X. Yuan, X. Zhang and X. Dai, *Dalton Trans.*, 2020, **49**, 13999-14008.
8. Q. Wang, S. Chen, J. Jiang, J. Liu, J. Deng, X. Ping and Z. Wei, *Chem. Commun.*, 2020, **56**, 2419-2422.
9. L. Huang, X. Zhang, Q. Wang, Y. Han, Y. Fang and S. Dong, *J. Am. Chem. Soc.*, 2018, **140**, 1142-1147.
10. S. Lu, K. Eid, D. Ge, J. Guo, L. Wang, H. Wang and H. Gu, *Nanoscale*, 2017, **9**, 1033-1039.
11. J. Xie, Q. Zhang, L. Gu, S. Xu, P. Wang, J. Liu, Y. Ding, Y. F. Yao, C. Nan and M. Zhao, *Nano Energy*, 2016, **21**, 247-257.
12. S. Xue, W. Deng, F. Yang, J. Yang, I. S. Amiin, D. He, H. Tang and S. Mu, *ACS Catal.*, 2018, **8**, 7578-7584.
13. B. Wu, J. Zhu, X. Li, X. Wang, J. Chu and S. Xiong, *Ionics*, 2019, **25**, 181-189.
14. N. Abdullah, S. Kamarudin, L. Shyuan and N. Karim, *Int. J. Hydrog. Energy*, 2019, **44**, 30543-30552.
15. Y. Tsukagoshi, H. Ishitobi and N. Nakagawa, *Carbon Resour. Convers.*, 2018, **1**, 61-72.
16. Z. Lin, W. Chen, Y. Jiang, T. Bian, H. Zhang, J. Wu, Y. Wang and D. Yang, *Nanoscale*, 2016, **8**, 12812-12818.
17. X. Chen, H. Wang, Y. Wang, Q. Bai, Y. Gao and Z. Zhang, *Catalysts*, 2015, **5**, 1003-1015.
18. V. Comignani, J. M. Sieben, M. D. Sanchez and M. M. Duarte, *Int. J. Hydrog. Energy*, 2017, **42**, 24785-24796.
19. Z. Yang, W. Cai, Q. Zhang, Y. Ling, X. Yu and Y. Zhang, *Int. J. Hydrog. Energy*, 2017, **42**, 12583-12592.
20. X.-L. Sui, C.-Z. Li, L. Zhao, Z.-B. Wang, D.-M. Gu and G.-S. Huang, *Int. J. Hydrog. Energy*, 2018, **43**, 5153-5162.



21. W. Chen, X. Wei and Y. Zhang, *Int. J. Hydrog. Energy*, 2014, **39**, 6995-7003.
22. X. Zhang, J. Ma, R. Yan, W. Cheng, J. Zheng and B. Jin, *J. Alloys Compd.*, 2021, **867**, 159017.
